## CORRECTION

# Correction: Trace element concentrations in forage seagrass species of *Chelonia mydas* along the Great Barrier Reef

Adam Wilkinson, Ellen Ariel, Jason van de Merwe, Jon Brodie

There are errors in the Funding section. The correct Funding statement is: Field and laboratory analysis components were kindly funded by the Worldwide Fund for nature (WWF) Australia. Publication costs were funded through the Higher Degree by Research Enhancement scheme (HDRES) offered by the College of Public Health, Medicine and Veterinary Sciences, James Cook University.

## Reference

1. Wilkinson A, Ariel E, van de Merwe J, Brodie J (2022) Trace element concentrations in forage seagrass species of *Chelonia mydas* along the Great Barrier Reef. PLoS ONE 17(6): e0269806. <https://doi.org/10.1371/journal.pone.0269806> PMID: 35704620

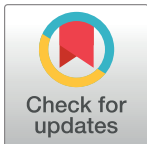

## OPEN ACCESS

**Citation:** Wilkinson A, Ariel E, van de Merwe J, Brodie J (2023) Correction: Trace element concentrations in forage seagrass species of *Chelonia mydas* along the Great Barrier Reef. PLoS ONE 18(10): e0292777. <https://doi.org/10.1371/journal.pone.0292777>

**Published:** October 5, 2023

**Copyright:** © 2023 Wilkinson et al. This is an open access article distributed under the terms of the [Creative Commons Attribution License](https://creativecommons.org/licenses/by/4.0/), which permits unrestricted use, distribution, and reproduction in any medium, provided the original author and source are credited.
